# Supplementary material
Source: publisher figshare collection journal article supplement (https://acs.figshare.com/ndownloader/files/24543819)
Supplement: Supplementary file 1 [file 24543819]

***Supporting Information for***  
**Stereolithography 3D Printing Solid Polymer Electrolytes for All-Solid-State Lithium-Metal Batteries**

*Yingjie He, Shaojie Chen, Lu Nie, Zhetao Sun, Xinsheng Wu, Wei Liu\**

School of Physical Science and Technology, ShanghaiTech University, Shanghai 201210, China.

\*Correspondence to: liuweil@shanghaitech.edu.cn

**This PDF file includes:**

**Figure S1.** Thermogravimetric analysis of the photopolymerized SPE.

**Figure S2.** Tape test of 3D-SPE and structure-free SPE supported cathode.

**Figure S3.** Electrochemical performance of the photopolymerized SPE with different weight ratios at 25 °C.

**Figure S4.** Voltage profiles of the Li|3D-SPE|LFP cell at various C-rates at 50 °C.

**Note S1.** Calculation the increased specific area between the cathode and 3D-SPE.

**Table S1.** Summary of fitting values for Nyquist plots

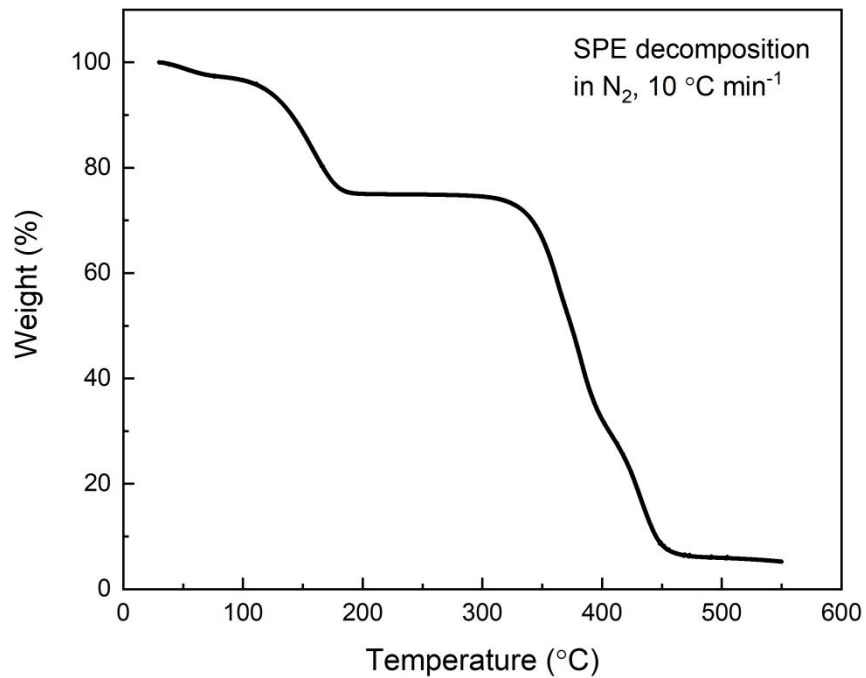

**Figure S1. Thermogravimetric analysis (TGA) showing the weight loss of SPE when heat up in the nitrogen to 550 °C with a scanning speed of 10 °C min<sup>-1</sup>. The weight of SPE shows a platform below 350 °C, indicating its thermal stability.**

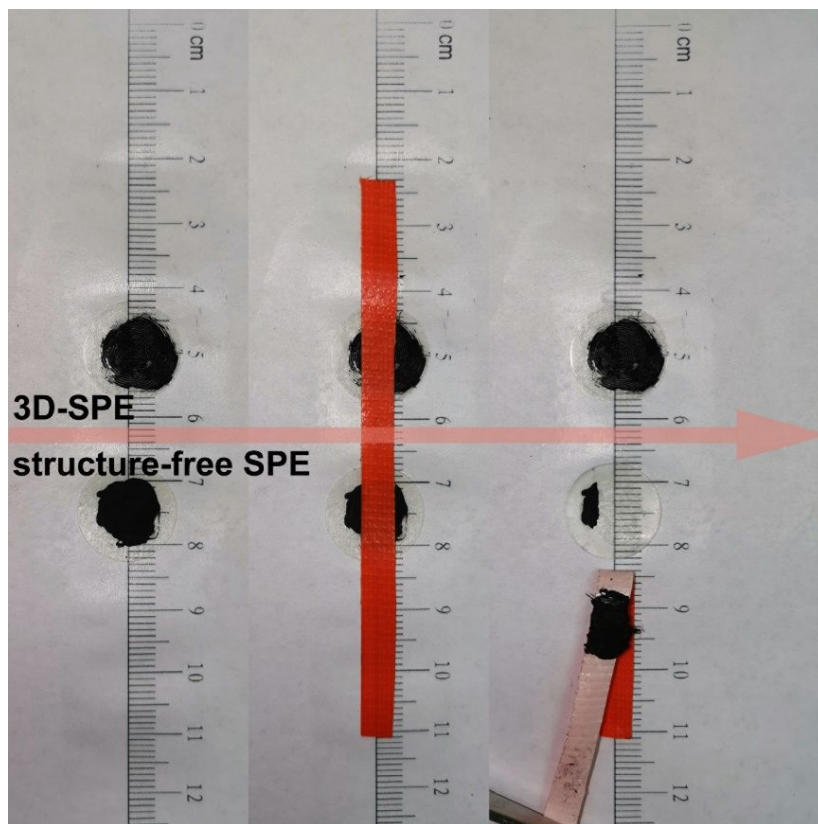

**Figure S2. Tape test of 3D-SPE and structure-free SPE supported cathode.**

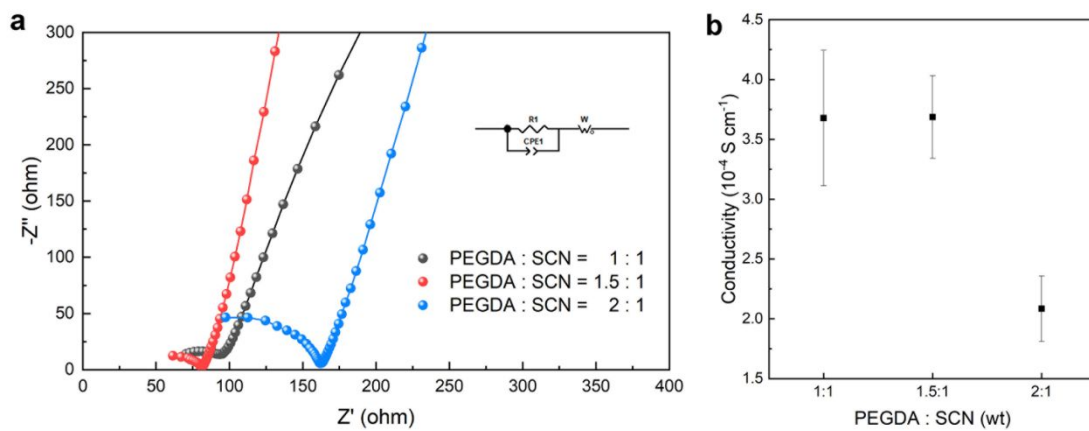

**Figure S3. Electrochemical performance of the photopolymerized SPE with different weight ratios at 25 °C. (a) Nyquist plots and (b) conductivity.**

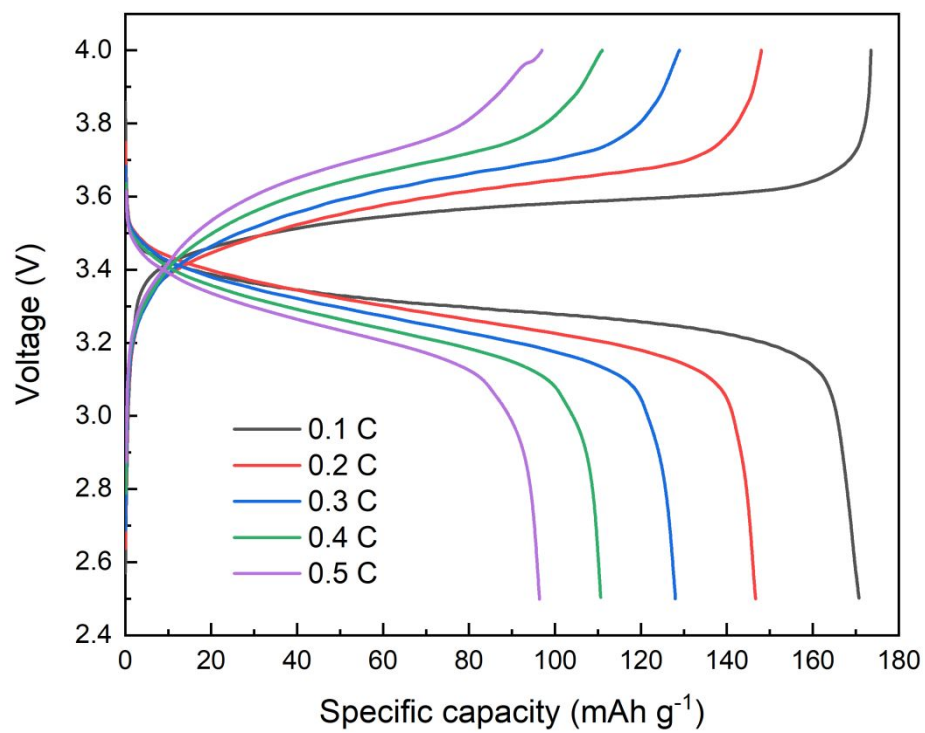

**Figure S4. Voltage profiles of the Li|3D-SPE|LFP cell at various C-rates at 50 °C.**

**Note S1. Calculation the increased specific area between the cathode and 3D-SPE.**

In this work, the Archimedes' Spiral is used as the 3D structure, and the polar equation is as follows:

$$\rho = a\theta \#(1)$$

the arc length is calculated by:

$$l = \frac{a}{2} [\theta\sqrt{1 + \theta^2} + \ln(\theta + \sqrt{1 + \theta^2})] \#(2)$$

The increase in contact area is the ratio between the vertical contact area  $A_{cv}$  and the horizontal

contact area  $A_{ch}$ :

$$\frac{A_{cv}}{A_{ch}} = \frac{2lh_s}{\pi r^2} = \frac{2lh_s}{\pi \rho^2} = \frac{h_s a [\theta\sqrt{1 + \theta^2} + \ln(\theta + \sqrt{1 + \theta^2})]}{\pi (a\theta)^2} = \frac{h_s}{\pi a} \times \frac{\theta\sqrt{1 + \theta^2} + \ln(\theta + \sqrt{1 + \theta^2})}{\theta^2} \#(3)$$

where  $h_s$  is the 3D structure height. When  $\theta$  is infinity,  $\frac{\theta\sqrt{1 + \theta^2} + \ln(\theta + \sqrt{1 + \theta^2})}{\theta^2}$  approaches 1, which indicated that there are two ways to increase the ratio. However, increasing the 3D structure height( $h_s$ ) or reducing the spiral spacing ( $a$ ) will weaken the 3D structure and trouble the filling of cathode slurry. To balance these factors, they're set as ( $a=0.05$  mm,  $\theta=45\pi$ , and  $h_s=0.15$  mm), so the increase in contact area is calculated as 95%.

**Table S1. Summary of fitting values for Nyquist plots**

| Cell type             | Temp.<br>[°C] | R[Ω] | CPE1-<br>T  | CPE1-<br>P | R <sub>in</sub> [Ω] | CPE2-<br>T  | CPE2-<br>P | R <sub>ct</sub> [Ω] | CPE3-<br>T  | CPE3-<br>P | W1-<br>R | W1-T | W1-P |
|-----------------------|---------------|------|-------------|------------|---------------------|-------------|------------|---------------------|-------------|------------|----------|------|------|
| Li structure-<br>free | 25            | 148  | 3.84E-<br>8 | 0.68       | 3409                | 6.46E-<br>7 | 0.90       | 518                 | 3.04E-<br>6 | 0.77       | 308      | 0.25 | 0.20 |
| SPE LFP               | 50            | 81.1 | 1.89E-<br>6 | 0.47       | 372                 | 8.85E-<br>7 | 0.94       | 308                 | 3.12E-<br>6 | 0.68       | 265      | 0.24 | 0.35 |
| Li 3D-<br>SPE LFP     | 25            | 128  | 2.07E-<br>7 | 0.59       | 1199                | 8.63E-<br>7 | 0.91       | 506                 | 4.20E-<br>6 | 0.73       | 1399     | 9.85 | 0.34 |
|                       | 50            | 78.6 | 6.64E-<br>5 | 0.26       | 88.8                | 1.69E-<br>6 | 1.08       | 305                 | 2.74E-<br>6 | 0.81       | 95.6     | 0.33 | 0.44 |
